# Supplementary material for: HDAC11: A novel inflammatory biomarker in Huntington’s disease
Source: PubMed Central journal article supplement (PMC9149973; doi:10.17179/excli2022-4741), 2022-03-24
Supplement: EXCLI-21-647-s-001.pdf [file EXCLI-21-647-s-001.pdf]

**Supplementary information to:**

**Letter to the editor:**

**HDAC11: A NOVEL INFLAMMATORY BIOMARKER IN  
HUNTINGTON'S DISEASE**

Vishal Kumar<sup>a</sup> , Simranjit Kaur<sup>a</sup> , Lakshay Kapil<sup>a</sup> , Charan Singh<sup>b</sup> , Arti Singh<sup>a\*</sup> 

<sup>a</sup> ISF College of Pharmacy, Department of Pharmacology, Moga-142001, Punjab, India

<sup>b</sup> ISF College of Pharmacy, Department of Pharmaceutics, Moga-142001, Punjab, India

<sup>a+b</sup> affiliated to IK Gujral Punjab Technical University, Jalandhar, Punjab, India

\* **Corresponding author:** Dr. Arti Singh, ISF College of Pharmacy, Department of Pharmacology, Moga-142001, Punjab, India. E-mail: [artiniper@gmail.com](mailto:artiniper@gmail.com)

<https://dx.doi.org/10.17179/excli2022-4741>

This is an Open Access article distributed under the terms of the Creative Commons Attribution License (<http://creativecommons.org/licenses/by/4.0/>).

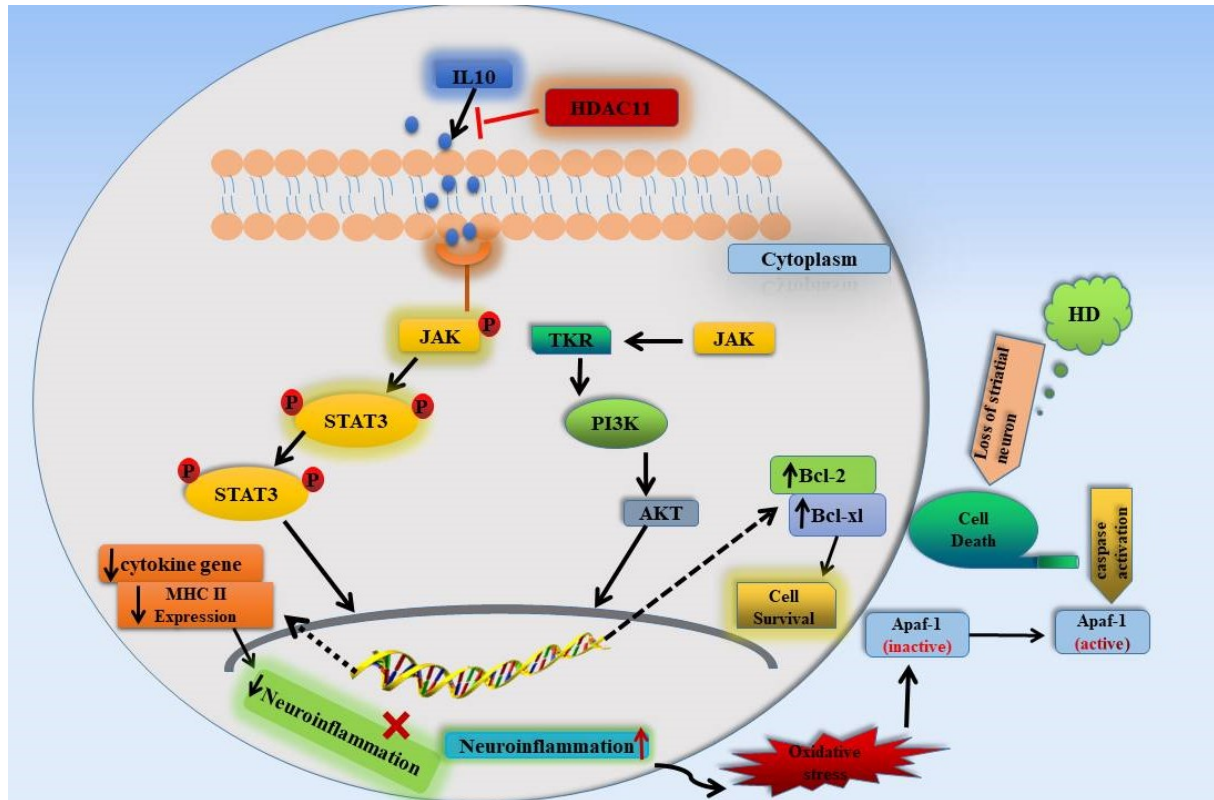

**Supplementary Figure 1:** Mechanistic representation of HDAC11 mediated HD pathogenesis. IL-10 acts through the JAK-STAT pathway migrates to the cell nucleus and lowers cytokine levels, resulting in the prevention of inflammation. In addition, IL-10 inhibits apoptosis and acts through the PI3K/AKT pathway to increase production of Bcl-2 and Bcl-x1 by decreasing caspase-3 expression and increasing cell survival. HDAC11 acts on IL-10 and inhibits its anti-inflammatory activity, leading to increased inflammation and ROS production, which can further lead to neuronal cell death via caspase signaling pathway activation.
